# Supplementary material
Source: Springer Nature journal article supplement (https://www.springermedizin.de/resource/supplementary/12985_2010_982_MOESM4_ESM.pdf/9608878)

**M****Inf****Inf + II****M + II****HDAC4**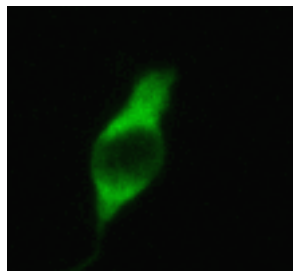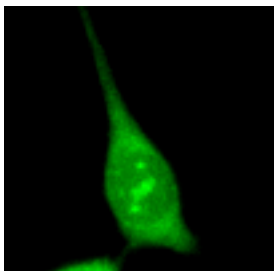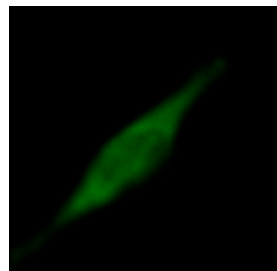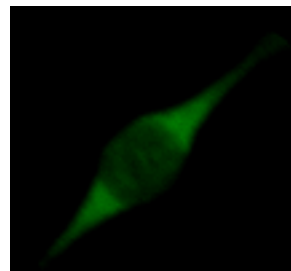**DAPI**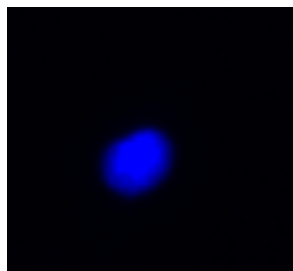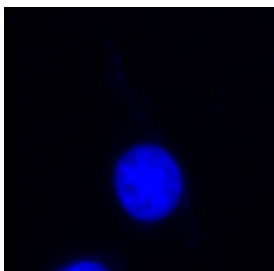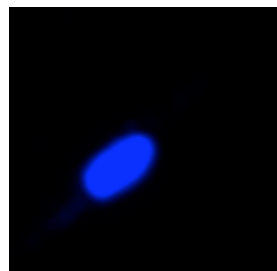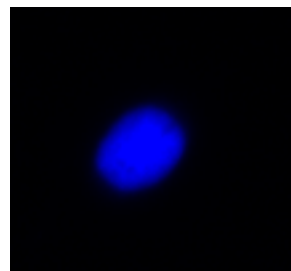**DIC**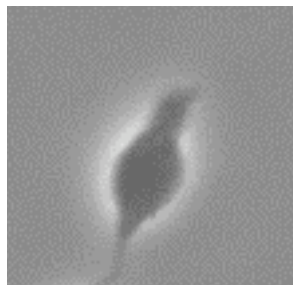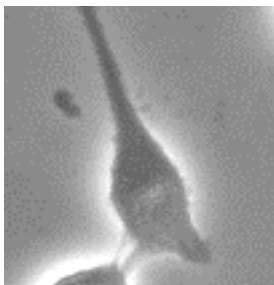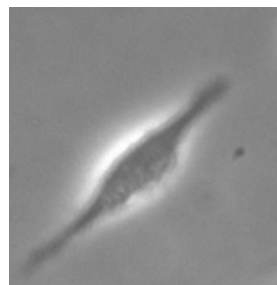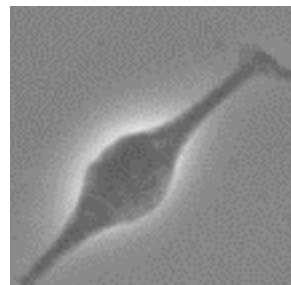

Supplement: MOESM4 [file 9608878]
